# Supplementary material for: Cascade Amplified Plasmonics Molecular Biosensor for Sensitive Detection of Disease Biomarkers
Source: MDPI journal article supplement (doi:10.3390/bios13080774), 2023-07-31
Supplement: s1 [file s1]

# Cascade Amplified Plasmonics Molecular Biosensor for Sensitive Detection of Disease Biomarkers

Hsin-Neng Wang <sup>1,2</sup> and Tuan Vo-Dinh <sup>1,2,3,\*</sup>

<sup>1</sup> Fitzpatrick Institute for Photonics, Duke University, Durham, NC 27708, USA; hsinneng.wang@duke.edu

<sup>2</sup> Department of Biomedical Engineering, Duke University, Durham, NC 27708, USA

<sup>3</sup> Department of Chemistry, Duke University, Durham, NC 27708, USA

\* Correspondence: tuan.vodinh@duke.edu

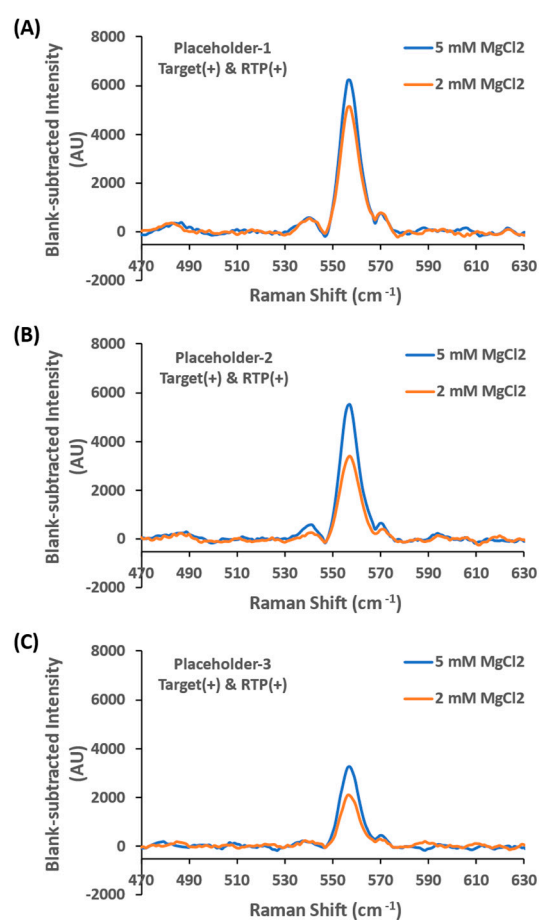

**Figure S1.** Blank-subtracted SERS spectra of the miR-21 iMS nanoprobe with (A) Placeholder-1, (B) Placeholder-2, and (C) Placeholder-3, in the presence 100 nM RTP strands and 1 nM targets (denoted as Target(+) & RTP(+)). The reactions were performed in 1xPBS buffer containing either 5 mM (blue spectrum) or 2 mM MgCl<sub>2</sub> (red spectrum) for 3 hours at room temperature. After incubation, 100  $\mu$ L of the samples were transferred to a glass vial for SERS measurements. The spectra were taken using 4.8 mW laser power, 10 second exposure time and 5 accumulations.

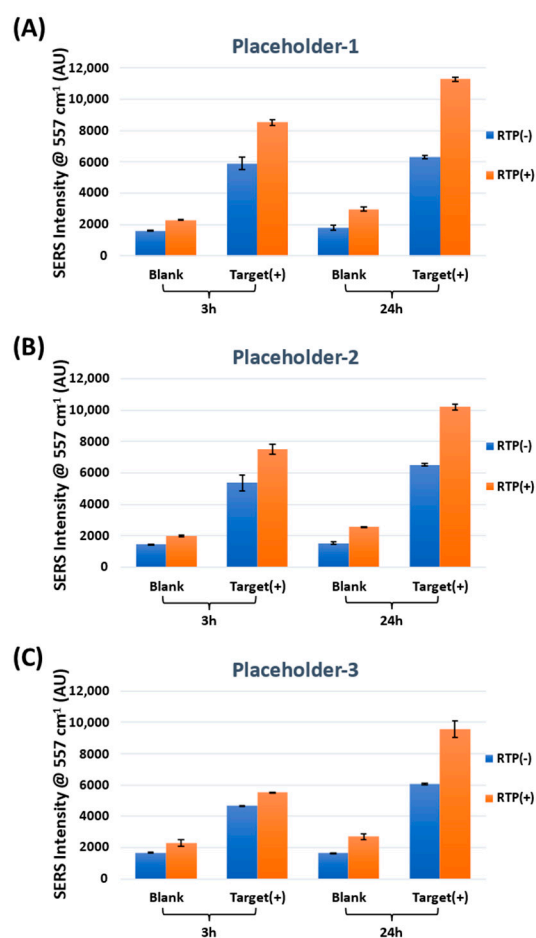

**Figure S2.** SERS peak-height intensity at 557 cm<sup>-1</sup> of the miR-21 iMS nanoprobe with (A) Placeholder-1, (B) Placeholder-2, and (C) Placeholder-3, in the presence (denoted as RTP(+)) or absence (denoted as RTP(-)) of 100 nM RTP strands. The SERS signal was measured after 3- or 24-hour incubation at room temperature with 1 nM targets (denoted as Target(+)) or without targets (denoted as Blank). After incubation, 100  $\mu$ L of the samples were transferred to a glass vial for SERS measurements. The spectra were taken using 4.8 mW laser power, 10 second exposure time and 5 accumulations.
